# Supplementary material for: A supramolecular spin crossover Fe(iii) complex and its Cr(iii) isomer: stabilization of water–chloride cluster within supramolecular host
Source: Royal Society of Chemistry journal article supplement (doi:10.1039/c0dt01256d), 2011-01-01
Supplement: c0dt01256d.pdf [file c0dt01256d.pdf]

## A Supramolecular Spin Crossover Fe(III) Complex and its Cr(III) Isomer: Stabilization of Water-Chloride Cluster within Supramolecular Host

Rajat Saha,<sup>‡</sup> Susobhan Biswas<sup>†</sup>, Ian M. Steele<sup>§</sup>, Kamalendu Dey<sup>†\*</sup> and Golam Mostafa<sup>\*\*</sup>

**Table S1:** Hydrogen bonding dimension of **complex 1**

| D-H...A       | D-H     | H...A   | D...A    | <D-H...A | Symmetry         |
|---------------|---------|---------|----------|----------|------------------|
| O1-H1...O6    | 0.8400  | 1.7500  | 2.583(3) | 169.00   | 1-x,1-y,1-z      |
| O5-H1W...Cl1  | 0.88(3) | 2.29(3) | 3.152(3) | 166(3)   | .                |
| O5-H2W...Cl1  | 1.00(4) | 2.16(4) | 3.144(3) | 167(4)   | x,3/2-y,-1/2+z   |
| O3-H3...Cl1   | 0.8400  | 2.2100  | 2.981(2) | 153.00   | 1-x,-1/2+y,3/2-z |
| O7-H3W...O5   | 1.00(4) | 1.88(4) | 2.852(3) | 165(4)   | x,3/2-y,1/2+z    |
| O7-H4W...O5   | 1.06(5) | 1.77(5) | 2.821(3) | 176(4)   | .                |
| O6-H5W...O7   | 1.06(3) | 1.67(3) | 2.723(3) | 169(3)   | 1-x,1-y,2-z      |
| O6-H6W...Cl1  | 0.78(3) | 2.55(3) | 3.287(3) | 159(3)   | 1-x,-1/2+y,3/2-z |
| C2-H2A...O1   | 0.9800  | 2.2400  | 2.696(3) | 107.00   | .                |
| C4-H4C...O2   | 0.9800  | 2.5100  | 3.418(3) | 155.00   | x,y,-1+z         |
| C6-H6A...N3   | 0.9900  | 2.2900  | 2.720(3) | 105.00   | .                |
| C9-H9B...S2   | 0.9900  | 2.5000  | 3.029(3) | 113.00   | .                |
| C11-H11A...O3 | 0.9800  | 2.2600  | 2.697(3) | 106.00   | .                |
| C13-H13C...O4 | 0.9800  | 2.5500  | 3.497(3) | 162.00   | x,y,1+z          |
| C15-H15A...N7 | 0.9900  | 2.3000  | 2.725(3) | 105.00   | .                |
| C18-H18B...S1 | 0.9900  | 2.5100  | 3.037(3) | 113.00   | .                |

**Table S2:** Hydrogen bonding dimension of **complex 2**

| D-H...A        | D-H       | H...A     | D...A    | <D-H...A  | Symmetry         |
|----------------|-----------|-----------|----------|-----------|------------------|
| O1W-H1W1...Cl1 | 0.88(3)   | 2.38(3)   | 3.256(2) | 171(3)    | 1-x, 1-y, 1-z    |
| O1-H2...Cl1    | 0.8400    | 2.2100    | 2.959(2) | 148.00    | x, y, 1+z        |
| O1W-H2W1...O2W | 0.900(16) | 1.910(17) | 2.717(3) | 148(2)    | x, 1/2-y, 1/2+z  |
| O2W-H1W2...O3W | 0.954(16) | 1.905(17) | 2.855(3) | 173.4(14) | 1-x, 1-y, 1-z    |
| O3-H4...O1W    | 0.8400    | 1.7500    | 2.559(3) | 161.00    | .                |
| O2W-H2W2...O3W | 0.99(2)   | 1.81(2)   | 2.798(3) | 176.3(14) | 1-x,-1/2+y,1/2-z |
| O3W-H1W3...Cl1 | 1.02(3)   | 2.17(2)   | 3.176(3) | 170.3(11) | x, 3/2-y, 1/2+z  |
| O3W-H2W3...Cl1 | 1.054(19) | 2.065(17) | 3.107(3) | 169.4(18) | x, y, 1+z        |
| C2-H2C...O1    | 0.9800    | 2.2600    | 2.695(3) | 106.00    | .                |
| C4-H4A...O2    | 0.9800    | 2.5000    | 3.468(3) | 169.00    | x, y, 1+z        |
| C6-H6A...S2    | 0.9900    | 2.5200    | 3.038(3) | 113.00    | .                |
| C9-H9B...N3    | 0.9900    | 2.3200    | 2.729(3) | 104.00    | .                |
| C11-H11A...O3  | 0.9800    | 2.2800    | 2.713(3) | 106.00    | .                |
| C13-H13A...O4  | 0.9800    | 2.4700    | 3.409(3) | 161.00    | x, y, -1+z       |

|               |        |        |          |        |   |
|---------------|--------|--------|----------|--------|---|
| C15-H15A...S1 | 0.9900 | 2.5100 | 3.028(3) | 112.00 | . |
| C18-H18B...N7 | 0.9900 | 2.3200 | 2.725(3) | 104.00 | . |

**Table S3:** MP2 OPTIMISED COORDINATES of Water Chloride CLUSTER FOR **Complex1**

| Atom | X             | Y             | Z             |
|------|---------------|---------------|---------------|
| Cl   | 0.            | 0.            | 0.            |
| Cl   | 0.            | 0.            | 5.59062374    |
| Cl   | 5.5899573606  | 0.            | -0.0862645    |
| O    | 2.808435138   | -1.319444729  | 0.5527142641  |
| O    | -0.5959826164 | -1.3194443944 | 2.7910509387  |
| O    | 0.1988251922  | -2.4363780165 | -2.1966530099 |
| O    | 2.1933239162  | -2.4363777101 | 5.3579274572  |
| O    | 1.805089082   | -2.8552658784 | 2.6954810616  |
| O    | 2.8669444864  | -2.8552665728 | -1.8495460206 |
| O    | 4.993974743   | -1.3194443946 | -2.8858373096 |
| H    | 2.0462930934  | -0.7574082619 | 0.4333971663  |
| H    | 3.5949083295  | -0.7849557442 | 0.5209645651  |
| H    | -0.4480717034 | -0.78931036   | 3.5672660842  |
| H    | -0.4824754887 | -0.7748116762 | 2.0207672764  |
| H    | 1.1318596569  | -2.5979773352 | -2.1777662789 |
| H    | 0.03278148    | -1.7536385673 | -1.5558592301 |
| H    | 2.1760287124  | -2.599138629  | 4.4206849923  |
| H    | 1.5991938684  | -1.7094728002 | 5.5040261036  |
| H    | 2.2860681684  | -2.3913208145 | 2.0194771841  |
| H    | 0.9398779905  | -2.4513470357 | 2.7084764348  |
| H    | 3.6731014133  | -2.5437427189 | -2.2341139215 |
| H    | 2.8320439326  | -2.4633340207 | -0.9775797617 |
| H    | 5.3520690627  | -1.0215948028 | -2.0457135578 |
| H    | 4.2881966277  | -0.7121320465 | -3.0463591522 |

**Table S4:** MP2 OPTIMISED COORDINATES of Water Chloride CLUSTER FOR **Complex 2**

| Atom | X             | Y             | Z             |
|------|---------------|---------------|---------------|
| CL   | 0.            | 0.            | 0.            |
| CL   | 0.            | 0.            | 5.3747492     |
| CL   | 5.3535369682  | 0.            | -0.4770521352 |
| O    | 2.7737220108  | -1.4714541557 | 0.4391742543  |
| O    | -0.6836312771 | -1.4714541116 | 2.6509553766  |
| O    | 0.0635105247  | -2.712659918  | -1.7982200989 |
| O    | 1.7854859558  | -2.7126598798 | 5.1518831776  |
| O    | 1.6921685598  | -3.0770929341 | 2.4588826063  |
| O    | 2.7541651066  | -3.0770929068 | -1.9442960479 |
| O    | 4.6699056863  | -1.4714541116 | -3.2008459523 |
| H    | 2.0087406361  | -0.9067918666 | 0.3501511224  |
| H    | 3.5482993884  | -0.9277798133 | 0.3407051771  |
| H    | -0.5232149529 | -0.9534258486 | 3.4327858276  |
| H    | -0.5577870458 | -0.9046759819 | 1.8984389803  |
| H    | 0.9870952437  | -2.8249644288 | -1.9648692153 |
| H    | -0.0318920881 | -1.9445000227 | -1.2467536014 |
| H    | 1.873847369   | -2.8393273845 | 4.2141119716  |
| H    | 1.2910512322  | -1.9102441977 | 5.270563117   |
| H    | 2.2107928415  | -2.5847486765 | 1.8332590205  |
| H    | 0.8331561231  | -2.6604070441 | 2.4590257901  |
| H    | 3.4966295894  | -2.7251609559 | -2.4124979376 |
| H    | 2.7812524041  | -2.6717999504 | -1.078503426  |
| H    | 5.0658916026  | -1.1210961901 | -2.3989510176 |
| H    | 3.9259776779  | -0.9042756868 | -3.33534292   |

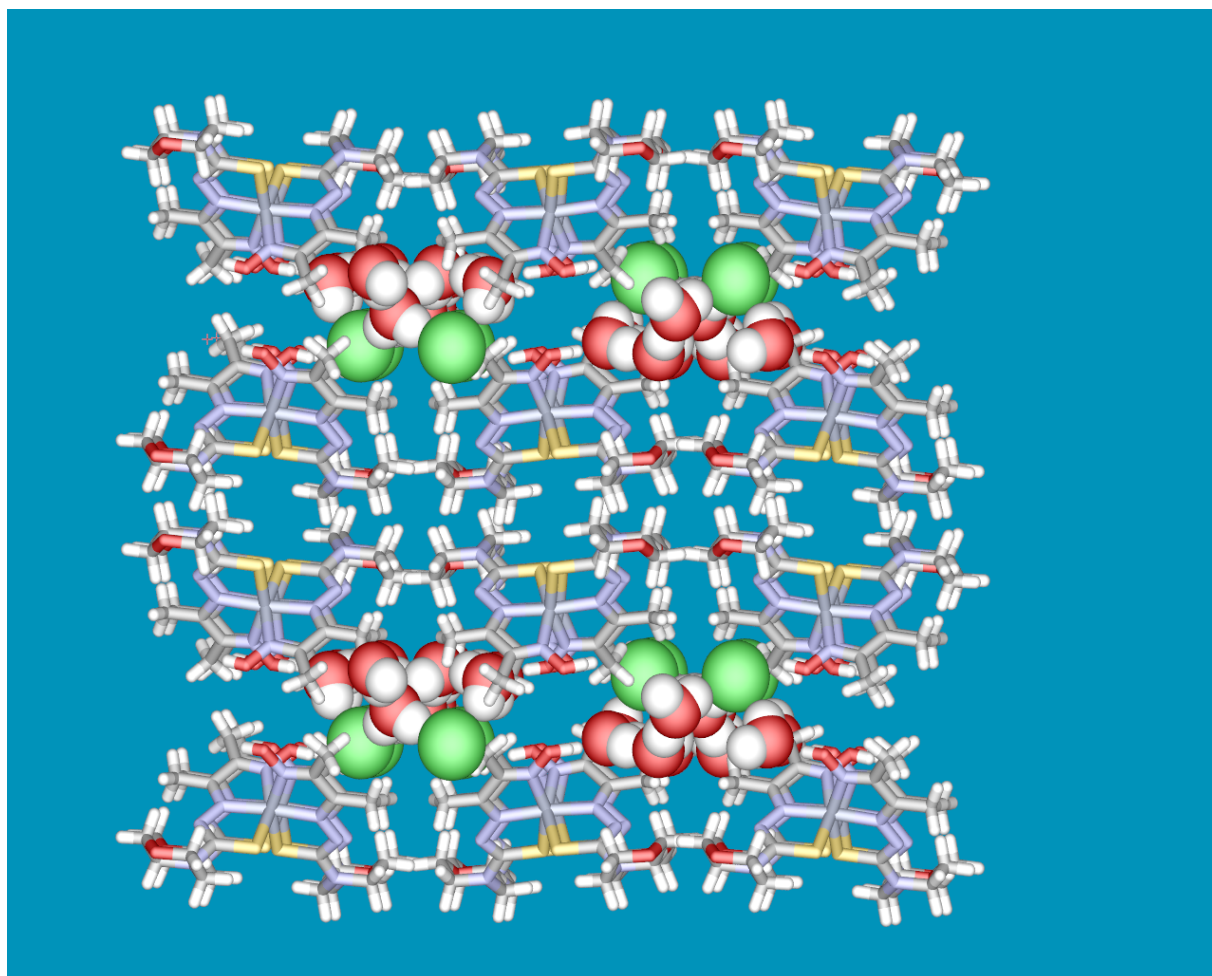

**Figure S1:** The supramolecular channels are filled up by water-chloride cluster

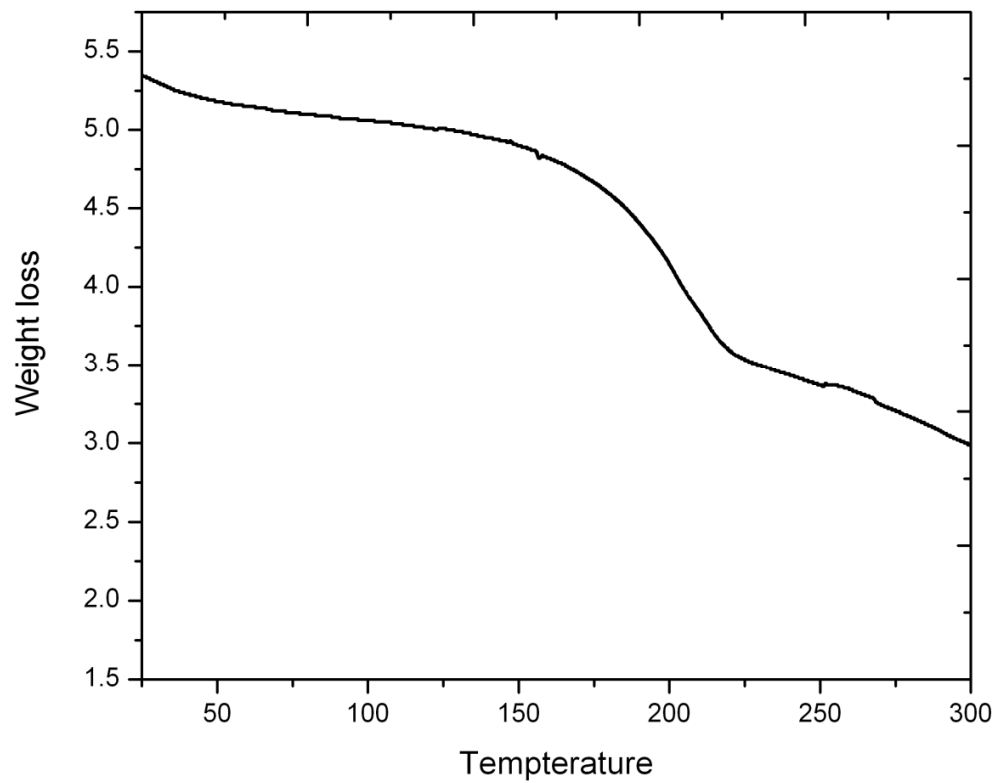

**Figure S2:** The thermal plot (weight change vs temp) of **complex1**

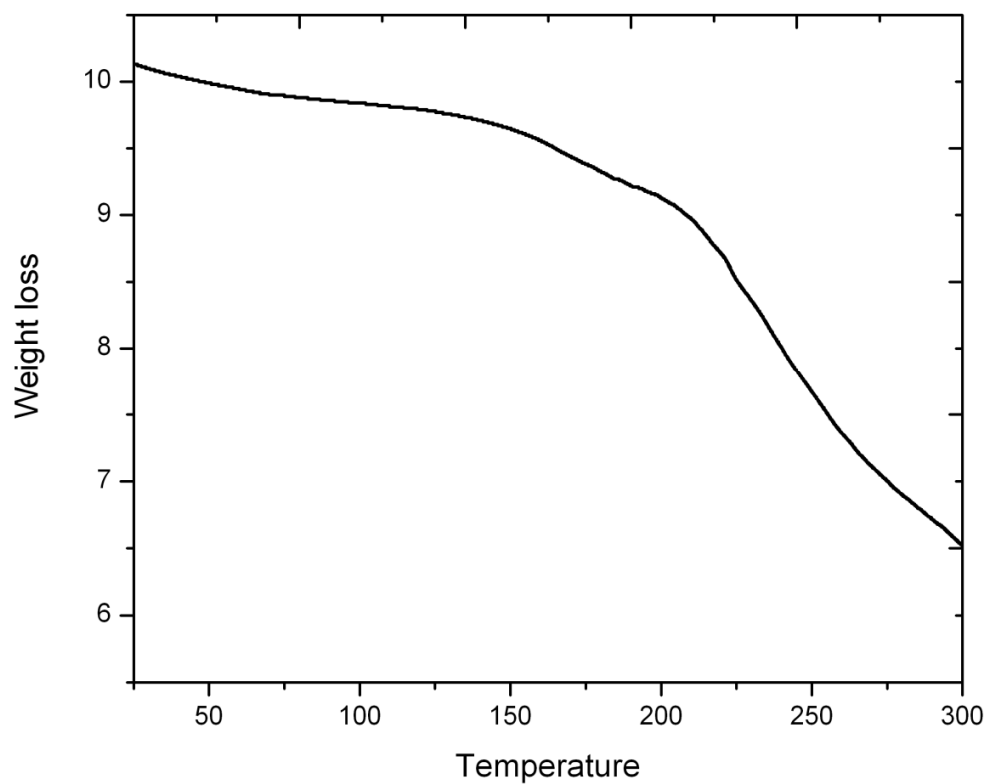

**Figure S3:** The thermal plot (weight change vs temp) of **complex 2**  
**(At higher temperature both compounds explodes due to unknown cause.)**

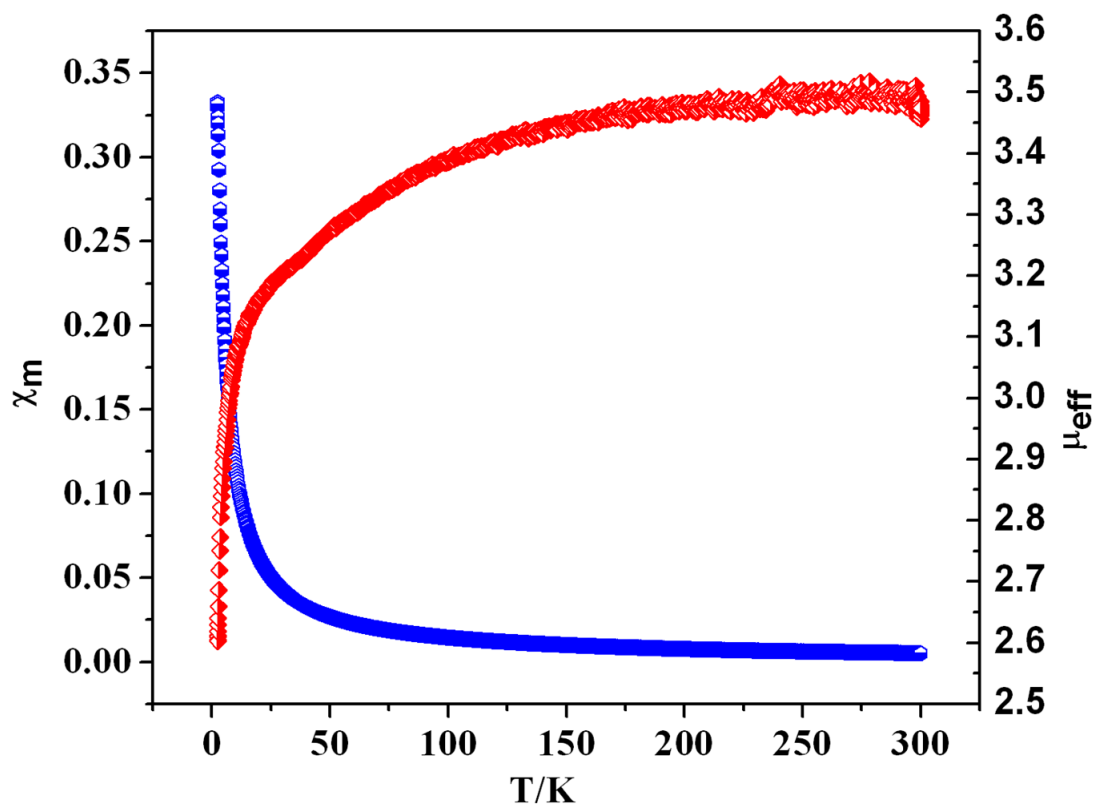

**Figure S4:** Temperature dependence of  $\chi_M$  vs  $T$  and  $\mu_{\text{eff}}$  vs  $T$  for **complex 2**

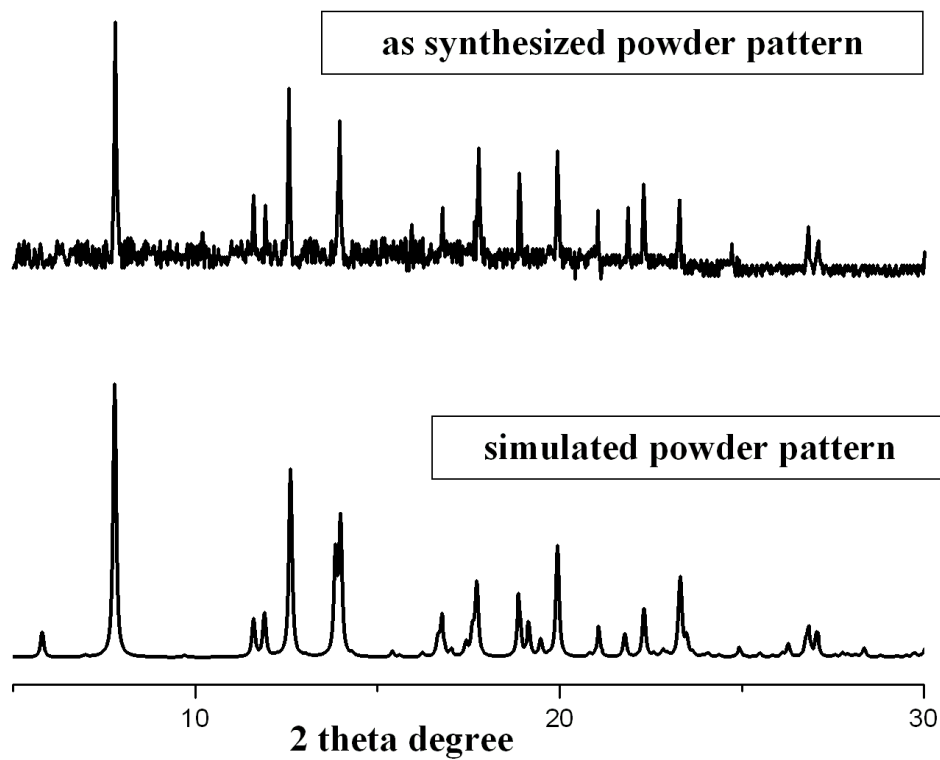

**Figure S5:** Powder XRD pattern at room temperature of **complex 2**
